# Supplementary material for: Machine learning potential for modelling H2 adsorption/diffusion in MOFs with open metal sites
Source: Royal Society of Chemistry journal article supplement (doi:10.1039/d3sc05612k), 2024-01-01
Supplement: d3sc05612k1.pdf [file d3sc05612k1.pdf]

## Supplementary Information

# **Machine Learning Potential for Modelling H<sub>2</sub> Adsorption/Diffusion in MOFs with Open Metal Sites**

Shanping Liu,<sup>a</sup> Romain Dupuis,<sup>a,b</sup> Dong Fan,<sup>a</sup> Salma Benzaria,<sup>c</sup>

Mickaele Bonneau,<sup>c</sup> Prashant Bhatt,<sup>c</sup> Mohamed Eddaoudi,<sup>c,\*</sup> and

Guillaume Maurin <sup>a,\*</sup>

a. ICGM, Université de Montpellier, CNRS, ENSCM, Montpellier, 34293, France

b. LMGC, Univ. Montpellier, CNRS, Montpellier, France

c. Division of Physical Science and Engineering, Advanced Membrane and Porous Materials Center, King Abdullah, University of Science and Technology (KAUST), Thuwal 23955-6900, Kingdom of Saudi Arabia

**Supplementary Table S1** | Data preparation for the MLP training of the H<sub>2</sub>@Al-soc-MOF-1d system (including DFT-optimizations and AIMD runs at 10-100K).

---

| <b>H<sub>2</sub> loading [per unit-cell]</b> | <b>Number of atoms</b> | <b>Number of configurations</b> |
|----------------------------------------------|------------------------|---------------------------------|
| <b>8</b>                                     | 448                    | 1575                            |
| <b>24</b>                                    | 480                    | 11574                           |
| <b>40</b>                                    | 512                    | 2236                            |
| <b>57</b>                                    | 546                    | 2148                            |
| <b>103</b>                                   | 638                    | 2204                            |
| <b>134</b>                                   | 700                    | 1882                            |

---

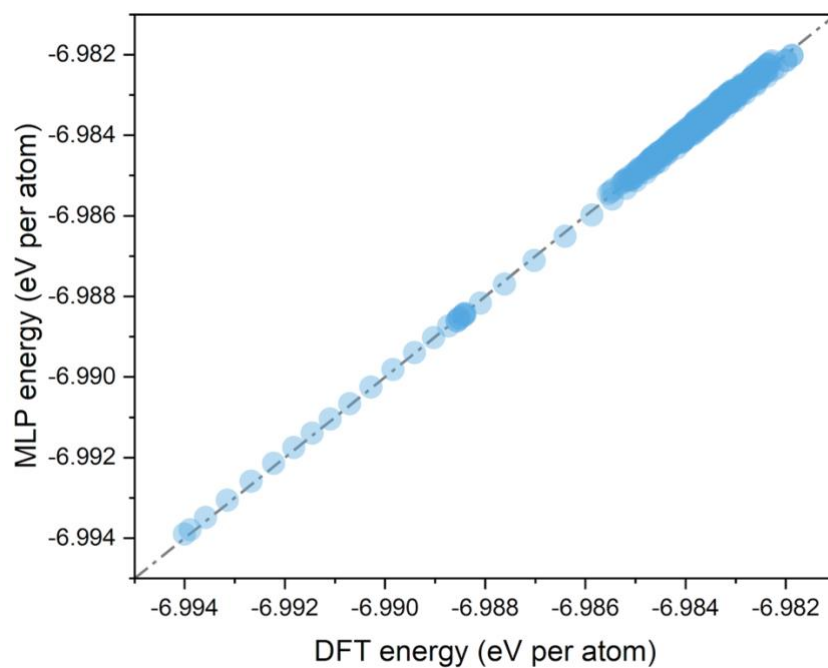

**Supplementary Fig. S1** | MLP derived energies vs the corresponding DFT values in the validation dataset.

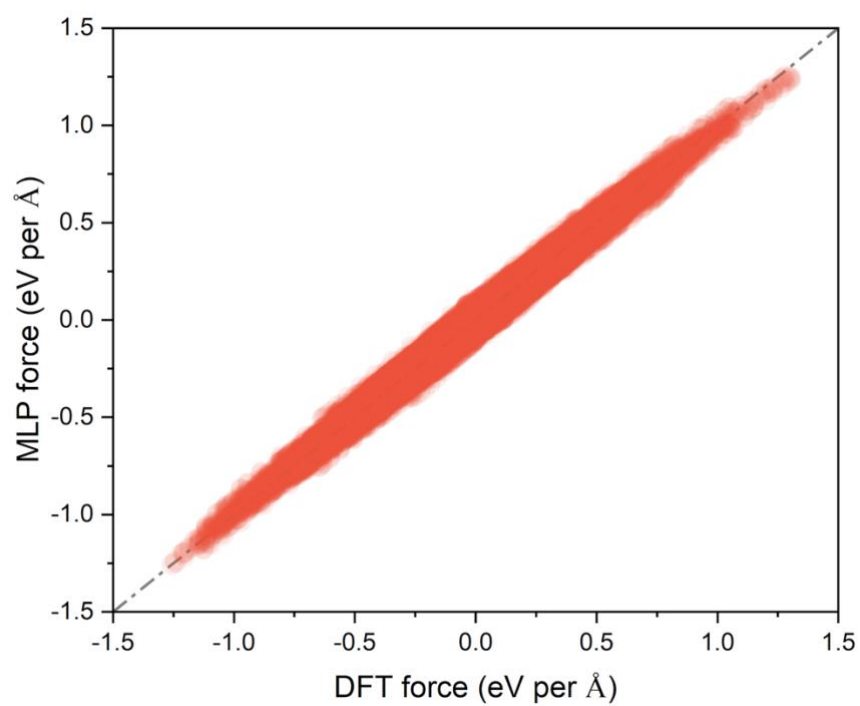

**Supplementary Fig. S2** | MLP derived forces vs the corresponding DFT values in the validation dataset.

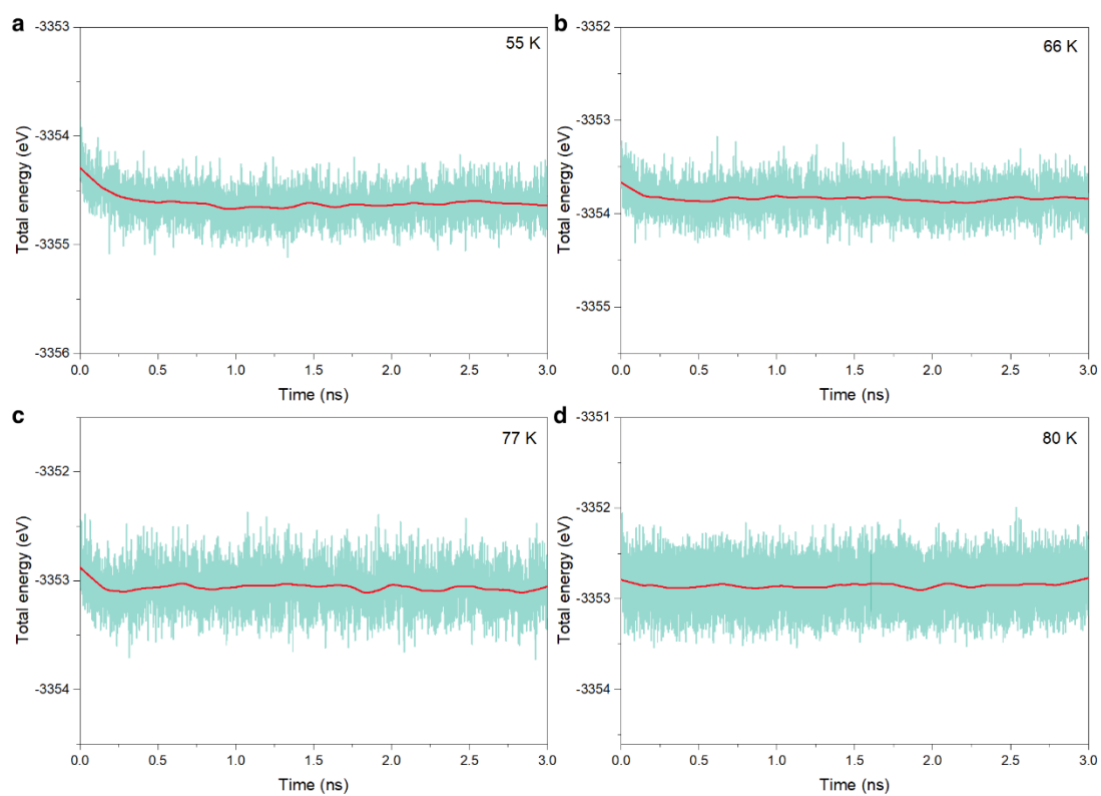

**Supplementary Fig. S3** | Evolution of the energy over the MLP-MD trajectories for 24  $\text{H}_2$ @Al-soc-MOF at (a-d) 55 K, 66 K, 77 K, and 80 K, respectively.

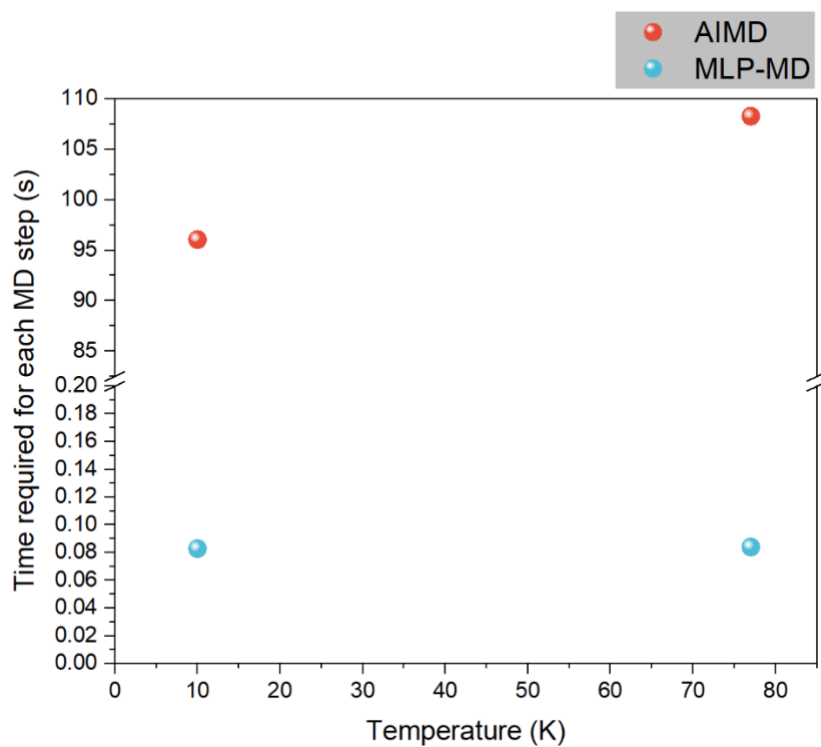

**Supplementary Fig. S4** | The CPU time comparison between AIMD and MLP-MD simulations at 10K and 77K temperatures (24 H<sub>2</sub> loading per unit-cell). For each system, the same CPU (192-cores) was used to compute the average time per MD time step in seconds.

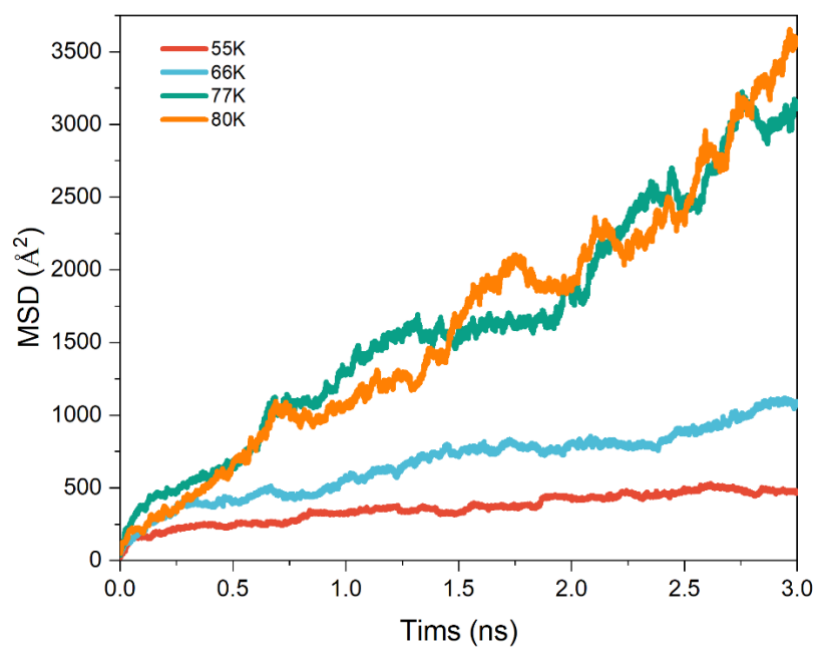

**Supplementary Fig. S5** | MLP-MD simulated mean square displacement (MSD) of H<sub>2</sub> molecules (24 H<sub>2</sub> per unit-cell loading) *versus* simulation time at different temperatures.

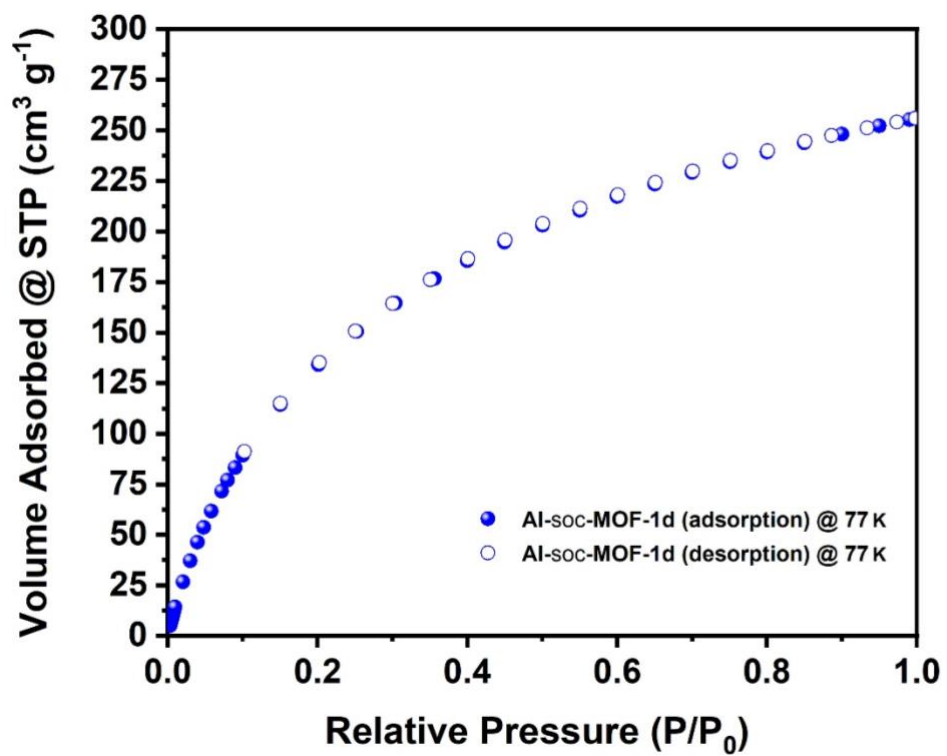

Supplementary Fig. S6 | Experimental  $\text{H}_2$  adsorption isotherms collected at 77 K up to 1 bar.
